# Supplementary material
Source: PubMed Central journal article supplement (PMC7082891)

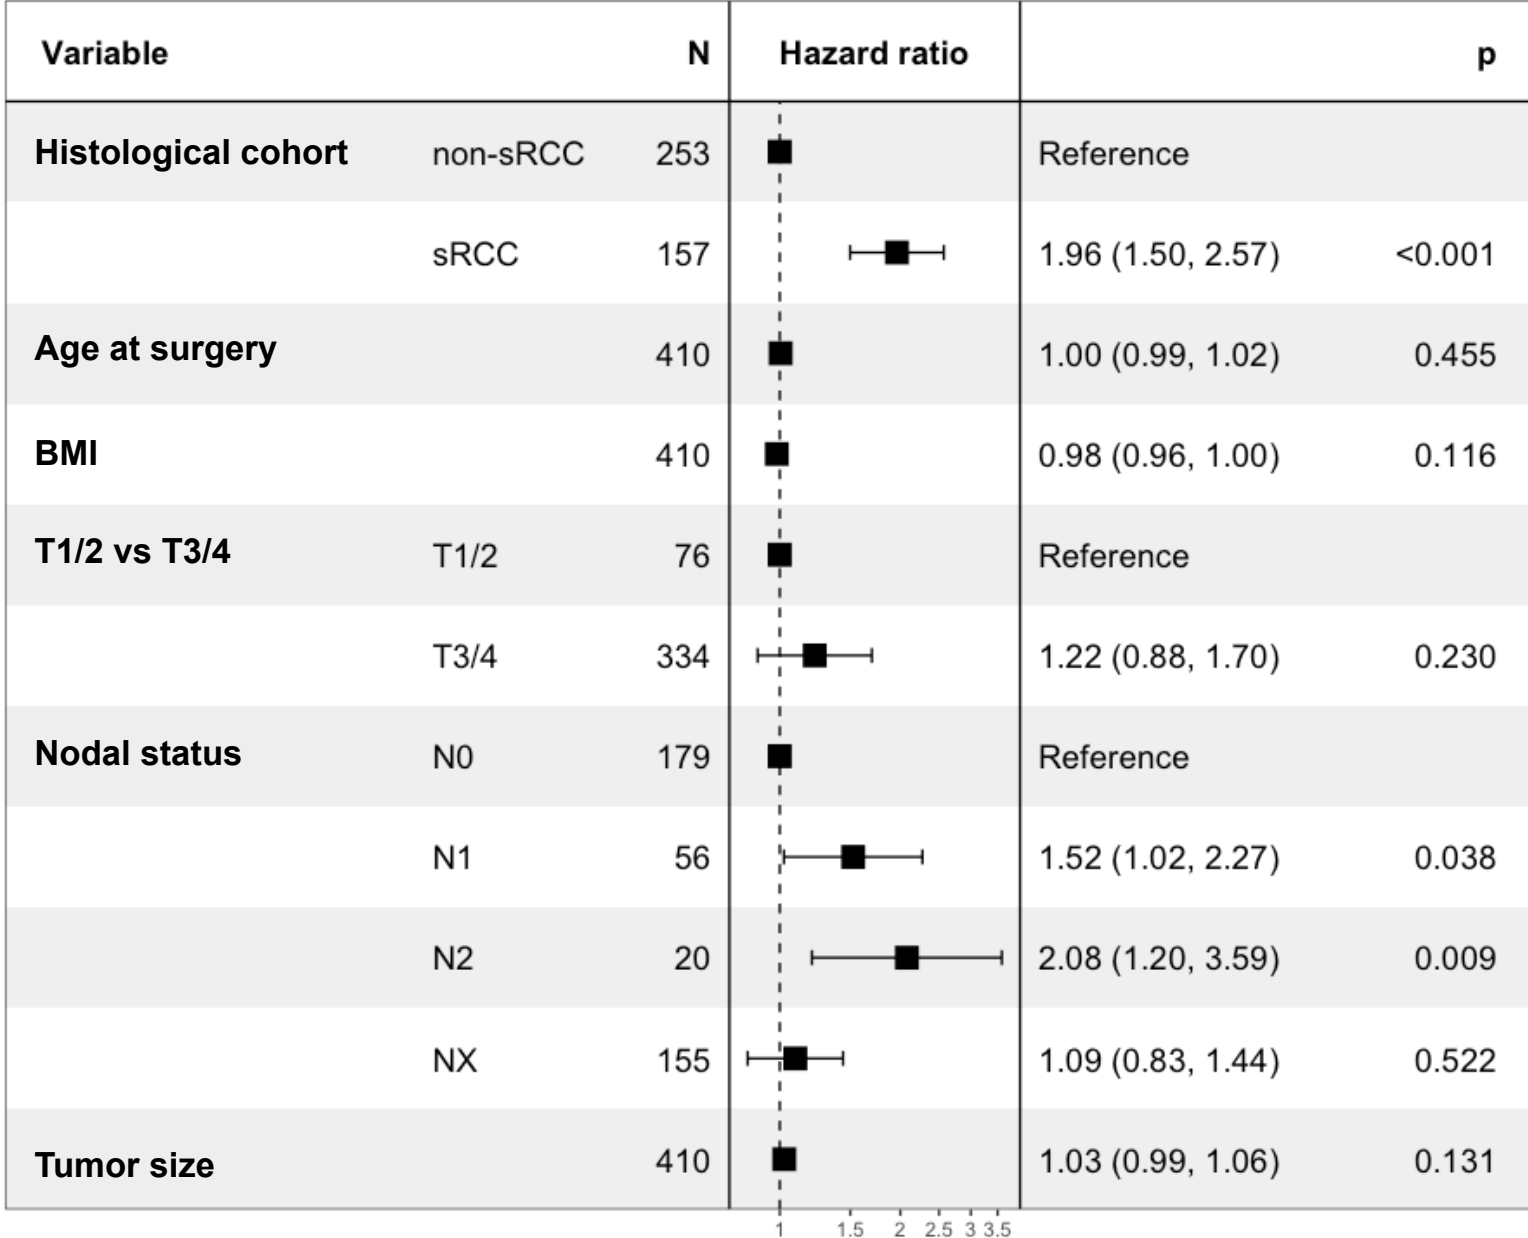

Supplement: NIHMS1543497-supplement-2.pdf [file NIHMS1543497-supplement-2.pdf]
